# Supplementary material for: Development and Application of a Duplex RT-RPA Assay for the Simultaneous Detection of Cymbidium mosaic virus and Odontoglossum ringspot virus
Source: MDPI journal article supplement (doi:10.3390/v16040543), 2024-03-30

**Table S1.** Results of gene chip detection

| Number | Plant sources                     | Place of collection | Symptoms                                                                            | Gene chip detection results                                                          |                   |                   |
|--------|-----------------------------------|---------------------|-------------------------------------------------------------------------------------|--------------------------------------------------------------------------------------|-------------------|-------------------|
|        |                                   |                     |                                                                                     | Picture of detection results                                                         | Detection virus   | Detection results |
| 1      | <i>Dendrobium</i> '135'           | Yunnan              |    |    | CymMV<br><br>ORSV | (+)<br><br>(-)    |
| 2      | <i>Oncidium</i> 'OB-2'            | Yunnan              |    |    | CymMV<br><br>ORSV | (-)<br><br>(-)    |
| 3      | <i>Zygopetulum</i> 'Zygopetalums' | Fujian              |  |  | CymMV<br><br>ORSV | (-)<br><br>(-)    |
| 4      | <i>Zygopetulum</i> 'Zygopetalums' | Fujian              |  |  | CymMV<br><br>ORSV | (+)<br><br>(-)    |
| 5      | <i>Zygopetulum</i> 'Zygopetalums' | Yunnan              |  |  | CymMV<br><br>ORSV | (+)<br><br>(-)    |

|    |                                    |         |                                                                                     |                                                                                      |       |     |
|----|------------------------------------|---------|-------------------------------------------------------------------------------------|--------------------------------------------------------------------------------------|-------|-----|
| 6  | <i>Oncidium</i><br>'Sweet Sugar'   | Guangxi |    |    | CymMV | (-) |
|    |                                    |         |                                                                                     |    | ORSV  | (-) |
| 7  | <i>Oncidium</i><br>'MXL'           | Guangxi |    |    | CymMV | (-) |
|    |                                    |         |                                                                                     |    | ORSV  | (-) |
| 8  | <i>Phalaenopsis</i><br>'amabilis'  | Yunnan  |   |   | CymMV | (-) |
|    |                                    |         |                                                                                     |   | ORSV  | (-) |
| 9  | <i>Phalaenopsis</i><br>'Ruyi'      | Yunnan  |  |  | CymMV | (+) |
|    |                                    |         |                                                                                     |  | ORSV  | (+) |
| 10 | <i>Phalaenopsis</i><br>'Ruyi'      | Yunnan  |  |  | CymMV | (+) |
|    |                                    |         |                                                                                     |  | ORSV  | (+) |
| 11 | <i>Phalaenopsis</i><br>'innsbruck' | Guangxi |                                                                                     |                                                                                      | CymMV | (-) |

|    |                                          |                                                                                     |                                                                                      |       |     |
|----|------------------------------------------|-------------------------------------------------------------------------------------|--------------------------------------------------------------------------------------|-------|-----|
|    |                                          |    |    | ORSV  | (-) |
| 12 | <i>Phalaenopsis</i><br>'Juguangdeng'     |    |    | CymMV | (-) |
|    |                                          |                                                                                     |                                                                                      | ORSV  | (-) |
| 13 | <i>Phalaenopsis</i><br>'Jinju'           |   |   | CymMV | (-) |
|    |                                          |                                                                                     |                                                                                      | ORSV  | (-) |
| 14 | <i>Phalaenopsis</i><br>'Formosa Sunrise' |  |  | CymMV | (-) |
|    |                                          |                                                                                     |                                                                                      | ORSV  | (+) |
| 15 | <i>Phalaenopsis</i><br>'Chocolate'       |  |  | CymMV | (-) |
|    |                                          |                                                                                     |                                                                                      | ORSV  | (-) |
| 16 | <i>Phalaenopsis</i><br>'Big chili'       |  |  | CymMV | (-) |
|    |                                          |                                                                                     |                                                                                      | ORSV  | (+) |

|    |                                      |           |                                                                                     |                                                                                      |           |          |
|----|--------------------------------------|-----------|-------------------------------------------------------------------------------------|--------------------------------------------------------------------------------------|-----------|----------|
| 17 | <i>Zygopetulum</i><br>'Zygopetalums' | Guangdong |    |    | CymMV (+) | ORSV (-) |
| 18 | <i>Dendrobium</i><br>'135'           | Guangdong |    |    | CymMV (+) | ORSV (-) |
| 19 | <i>Zygopetulum</i><br>'Zygopetalums' | Guangdong |   |   | CymMV (+) | ORSV (-) |
| 20 | <i>Phalaenopsis</i><br>'Feilala'     | Guangdong |  |  | CymMV (-) | ORSV (-) |

Note :The test results of the gene chip are read as follows:

Negative sample: 

Samples carrying ORSV: 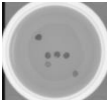

Samples carrying CymMV: 

Samples carrying CymMV+ORSV: 

Supplement: s1 [file s1]
